# Supplementary material for: Dissecting the basis for differential substrate specificity of ADAR1 and ADAR2
Source: PubMed Central journal article supplement (PMC10713624; doi:10.1038/s41467-023-43633-0), 2023-12-11
Supplement: 41467_2023_43633_MOESM3_ESM.pdf [file 41467_2023_43633_MOESM3_ESM.pdf]

**Supplementary Data 1. Primers and oligos**

| ID                                   | Comment                                                                                                    | Sequence                                                                                                                                                                                                                                                                                                                                                                          |
|--------------------------------------|------------------------------------------------------------------------------------------------------------|-----------------------------------------------------------------------------------------------------------------------------------------------------------------------------------------------------------------------------------------------------------------------------------------------------------------------------------------------------------------------------------|
| AC_mis_3nuc_26bp_S<br>MAD4_UTR_151bp | SMAD4 targeting oligo, with 3 mismatched bases opposite of +26 from the targeted adenosine (gene block)    | CAATCCGCCCTCACTACAACCGGAAATTTCCCGGGCCTTAAGCTAGCATGTTTTAAAA<br>AAGGCTAGTGAGCTGGACGGCGACGTAAAGGTACCGTAGAATGATATACATATCGAT<br>GTTCTGCAGATAAAAGGCTCTAAGACCAATTAAGGGCTAAATTTTCTAGCACCGGAA<br>TGATTCCCTCATAACAGGTGAAGAATTAATAAGAATGTGTTTCTCCTAATCTTCA<br>AGCTCTGAGCCATTTTTTTGGTACCGAACGCTGACGTCATCAACCATGATCTCTTTTCGG<br>CCGCGCATGCTGCATATAGTGTCATAGATCATCTACTCTGGCGTCGATGAGGGA         |
| A_C_SMAD4_UTR_15<br>1bp              | SMAD4 targeting positive control oligo (gene block)                                                        | CAATCCGCCCTCACTACAACCGGAAATTTCCCGGGCCTTAAGCTAGCATGTTTTAAAA<br>AAGGCTAGTGAGCTGGACGGCGACGTAAAGGTACCGTAGAATGATATACATATCGAT<br>GTTCTGCAGATAAAAGGCTCTAAGACGTTTTAAAGGGCTAAATTTTCTAGCACCGGAA<br>TGATTCCCTCATAACAGGTGAAGAATTAATAAGAATGTGTTTCTCCTAATCTTCA<br>AGCTCTGAGCCATTTTTTTGGTACCGAACGCTGACGTCATCAACCATGATCTCTTTTCGG<br>CCGCGCATGCTGCATATAGTGTCATAGATCATCTACTCTGGCGTCGATGAGGGA        |
| A_C_mis_3nuc_26bp_1<br>51bp_PPIB_UTR | PPIB UTR targeting oligo, with 3 mismatched bases opposite of +26 from the targeted adenosine (gene block) | CAATCCGCCCTCACTACAACCGGAAATTTCCCGGGCCTTAAGCTAGCATGTTTTAAAA<br>AAGGCTAGTGAGCTGGACGGCGACGTAAAGGTACCGAATGTGAGGGGAGTGGGTCC<br>GCTCCACCAGATGCCAGCACCGGGGCCCTCAGCAGCTCAGAGCCCTGTGGCGGACCA<br>CAGGGCCTGCACAGACGGTCACTCAAAGAAAGATGTCCCTGTGCCCTACTCCTTGGC<br>GATGGCAAAGGGCTTCTTTTTTTGGTACCGAACGCTGACGTCATCAACCATGATCTCT<br>TTCGGCCGCGCATGCTGCATATAGTGTCATAGATCATCTACTCTGGCGTCGATGAGG<br>GA |
| A_C_mis_151bp_PPIB<br>_UTR           | PPIB UTR targeting positive control oligo (gene block)                                                     | CAATCCGCCCTCACTACAACCGGAAATTTCCCGGGCCTTAAGCTAGCATGTTTTAAAA<br>AAGGCTAGTGAGCTGGACGGCGACGTAAAGGTACCGAATGTGAGGGGAGTGGGTCC<br>GCTCCACCAGATGCCAGCACCGGGGCCAGTGCAGCTCAGAGCCCTGTGGCGGACCA<br>CAGGGCCTGCACAGACGGTCACTCAAAGAAAGATGTCCCTGTGCCCTACTCCTTGGC<br>GATGGCAAAGGGCTTCTTTTTTTGGTACCGAACGCTGACGTCATCAACCATGATCTCT<br>TTCGGCCGCGCATGCTGCATATAGTGTCATAGATCATCTACTCTGGCGTCGATGAGG<br>GA  |

|                                      |                                                                                                            |                                                                                                                                                                                                                                                                                                                                                                             |
|--------------------------------------|------------------------------------------------------------------------------------------------------------|-----------------------------------------------------------------------------------------------------------------------------------------------------------------------------------------------------------------------------------------------------------------------------------------------------------------------------------------------------------------------------|
| A_Cmis_3_nuc_26bp_1<br>51bp_PPIB_ORF | PPIB ORF targeting oligo, with 3 mismatched bases opposite of +26 from the targeted adenosine (gene block) | CAATCCGCCCTCACTACAACCGGAAATTTCCCGGGCCTTAAGCTAGCATGTTTTAAAA<br>AAGGCTAGTGAGCTGGACGGCGACGTAAAGGTACCGATCACATCCTTCAGGGGTTTA<br>TCCCGGCTGTCTGTCTTGGTGCTCTCGTGCTTCCGCACCACCTCCATGCCCTCCAGA<br>ACTTTGCCAAACACCACATGCTTGCCATCTAGCCAGGCTGTCTTGACTGTCGTGATGA<br>AGAAGTGGGAGCCGTTTTTTGGTACCGAACGCTGACGTCATCAACCATGATCTCTTTC<br>GGCCGCGCATGCTGCATATAGTGTATAGATCATCTACTCTGGCGTCGATGAGGGA |
| A_C_mis_151bp_PPIB_ORF               | PPIB ORF targeting positive control oligo (gene block)                                                     | CAATCCGCCCTCACTACAACCGGAAATTTCCCGGGCCTTAAGCTAGCATGTTTTAAAA<br>AAGGCTAGTGAGCTGGACGGCGACGTAAAGGTACCGATCACATCCTTCAGGGGTTTA<br>TCCCGGCTGTCTGTCTTGGTGCTCTCCACCTTCCGCACCACCTCCATGCCCTCCAGA<br>ACTTTGCCAAACACCACATGCTTGCCATCTAGCCAGGCTGTCTTGACTGTCGTGATGA<br>AGAAGTGGGAGCCGTTTTTTGGTACCGAACGCTGACGTCATCAACCATGATCTCTTTC<br>GGCCGCGCATGCTGCATATAGTGTATAGATCATCTACTCTGGCGTCGATGAGGGA |
| STAT1_A_C_mismatch_151bp             | STAT1 targeting positive control oligo (gene block)                                                        | CAATCCGCCCTCACTACAACCGATTTCCCGGGCCTTAAGCTAGCATGTTTTAAAAAAG<br>GCTAGTGAGCTGGACGGCGACGTAAAGGTACCATGGGGAGCAGGTTGTCTGTGGTC<br>TGAAGTCTAGAAGGGTGAAGTTCAGACACAGAAATCAACTCAGTCTTGATACATCCAG<br>TTCCTTTAGGGCCATCAAGTTCATTGGCTCTGGTGCTTCCCTTTGGCCTGGAGTAATA<br>CTTTCCAAAGGTTTTTTGGTACCGAACGCTGACGTCATCAACCATGATCTCTTTCCGGC<br>CGCGCATGCTGCATATAGTGTATAGATCATACTACTCTGGCGTCGATGAGGGA  |
| STAT1_A_C_mis_3nuc_mis_27bp_151bp    | STAT1 targeting oligo, with 3 mismatched bases opposite of +26 from the targeted adenosine (gene block)    | CAATCCGCCCTCACTACAACCGATTTCCCGGGCCTTAAGCTAGCATGTTTTAAAAAAG<br>GCTAGTGAGCTGGACGGCGACGTAAAGGTACCATGGGGAGCAGGTTGTCTGTGGTC<br>TGAAGTCTAGAAGGGTGAAGTTCCTCTCACAGAAATCAACTCAGTCTTGATACATCCAG<br>TTCCTTTAGGGCCATCAAGTTCATTGGCTCTGGTGCTTCCCTTTGGCCTGGAGTAATA<br>CTTTCCAAAGGTTTTTTGGTACCGAACGCTGACGTCATCAACCATGATCTCTTTCCGGC<br>CGCGCATGCTGCATATAGTGTATAGATCATACTACTCTGGCGTCGATGAGGGA |
| RE_A_C_mis_151_GA<br>PDH             | GAPDH targeting positive control oligo (gene block)                                                        | ATTTCCCGGGCCTTAAGCTAGCATGTTTTAAAAAAGGCTAGTGAGCTGGACGGCGAC<br>GTAAAGGTACCGTTGAGCACAGGGTACTTTATTGATGGTACATGACAAGGTGCGGCT<br>CCCTAGGCCCTCCCCTCTTCAAGGGGTCCACATGGCAACTGTGAGGAGGGGAGAT<br>TCAGTGTGGTGGGGACTGAGTGTGGCAGGGACTCCCAGCAGTGAGGGTTTTTTG<br>GTACCGAACGCTGACGTCATCAACCATGATCTCTTTCCGGCCGCGCATGCTGCATATA<br>GTGTATAGATCATACT                                               |

|                                            |                                                                                                         |                                                                                                                                                                                                                                                                                                                                                                                 |
|--------------------------------------------|---------------------------------------------------------------------------------------------------------|---------------------------------------------------------------------------------------------------------------------------------------------------------------------------------------------------------------------------------------------------------------------------------------------------------------------------------------------------------------------------------|
| RE_ACmis_151_GAPD<br>H_27bp_3nuc_mis       | GAPDH targeting oligo, with 3 mismatched bases opposite of +27 from the targeted adenosine (gene block) | ATTTCCCGGGCCTTAAGCTAGCATGTTTTAAAAAGGCTAGTGAGCTGGACGGCGAC<br>GTAAAGGTACCGTTGAGCACAGGGTACTTTATTGATGGTACATGACAAGGTGCGGCT<br>CGGAAGGCCCTCCCCTCTTCAAGGGGTCCACATGGCAACTGTGAGGAGGGGAGAT<br>TCAGTGTGGTGGGGGACTGAGTGTGGCAGGGACTCCCCAGCAGTGAGGGTTTTTTG<br>GTACCGAACGCTGACGTCATCAACCATGATCTCTTTTCGGCCGCGCATGCTGCATATA<br>GTGTCATAGATCATACT                                                 |
| SMAD4_perfect_ds_GA<br>_context_151bp      | SMAD4 targeting perfect double-stranded oligo (gene block)                                              | CAATCCGCCCTCACTACAACCGGAAATTTCCCGGGCCTTAAGCTAGCATGTTTTAAAA<br>AAGGCTAGTGAGCTGGACGGCGACGTAAAGGTACCAAGGTTAAGGGCCCCAACGGT<br>AAAAGACCTCAGTCTAAAGTTGTGGGTCTGCAATCGGCATGGTATGAAGTACTTCGT<br>CTAGGAGCTGGAGGGCCCGGTGTAAGTGAATTTCAATCCAGCAAGGTGTTTCTTTGA<br>TGCTCTGTCTTGGGTTTTTTTGGTACCGAACGCTGACGTCATCAACCATGATCTCTTT<br>CGGCCGCGCATGCTGCATATAGTGTCATAGATCATCTACTCTGGCGTCGATGAGGGA     |
| SMAD4_A_mismatch_<br>GA_context_151bp      | SMAD4-targeting oligo, with A mismatched bases opposite of -1 from the targeted adenosine (gene block)  | CAATCCGCCCTCACTACAACCGGAAATTTCCCGGGCCTTAAGCTAGCATGTTTTAAAA<br>AAGGCTAGTGAGCTGGACGGCGACGTAAAGGTACCAAGGTTAAGGGCCCCAACGGT<br>AAAAGACCTCAGTCTAAAGTTGTGGGTCTGCAATCGGCATGGTATGAAGTACTTAGT<br>CTAGGAGCTGGAGGGCCCGGTGTAAGTGAATTTCAATCCAGCAAGGTGTTTCTTTGA<br>TGCTCTGTCTTGGGTTTTTTTGGTACCGAACGCTGACGTCATCAACCATGATCTCTTT<br>CGGCCGCGCATGCTGCATATAGTGTCATAGATCATCTACTCTGGCGTCGATGAGGGA     |
| SMAD4_G_mismatch_<br>GA_context_151bp      | SMAD4-targeting oligo, with G mismatched bases opposite of -1 from the targeted adenosine (gene block)  | CAATCCGCCCTCACTACAACCGGAAATTTCCCGGGCCTTAAGCTAGCATGTTTTAAAA<br>AAGGCTAGTGAGCTGGACGGCGACGTAAAGGTACCAAGGTTAAGGGCCCCAACGGT<br>AAAAGACCTCAGTCTAAAGTTGTGGGTCTGCAATCGGCATGGTATGAAGTACTTGG<br>TCTAGGAGCTGGAGGGCCCGGTGTAAGTGAATTTCAATCCAGCAAGGTGTTTCTTTG<br>ATGCTCTGTCTTGGGTTTTTTTGGTACCGAACGCTGACGTCATCAACCATGATCTCTT<br>TCGGCCGCGCATGCTGCATATAGTGTCATAGATCATCTACTCTGGCGTCGATGAGGG<br>A |
| SMAD4_3_bp_mismatch_<br>h_GA_context_151bp | SMAD4-targeting oligo, with 3 mismatched bases opposite to the targeted adenosine (gene block)          | CAATCCGCCCTCACTACAACCGGAAATTTCCCGGGCCTTAAGCTAGCATGTTTTAAAA<br>AAGGCTAGTGAGCTGGACGGCGACGTAAAGGTACCAAGGTTAAGGGCCCCAACGGT<br>AAAAGACCTCAGTCTAAAGTTGTGGGTCTGCAATCGGCATGGTATGAAGTACAAGG<br>TCTAGGAGCTGGAGGGCCCGGTGTAAGTGAATTTCAATCCAGCAAGGTGTTTCTTTG<br>ATGCTCTGTCTTGGGTTTTTTTGGTACCGAACGCTGACGTCATCAACCATGATCTCTT<br>TCGGCCGCGCATGCTGCATATAGTGTCATAGATCATCTACTCTGGCGTCGATGAGGG<br>A |
| Geneblock PCR F                            | PCR primer to amplify gene blocks                                                                       | gagctggacggcgacgtaaa                                                                                                                                                                                                                                                                                                                                                            |

|                       |                                                                                    |                              |
|-----------------------|------------------------------------------------------------------------------------|------------------------------|
| Geneblock PCR R       | PCR primer to amplify gene blocks                                                  | Ggttgatgacgtcagcgcttc        |
| RW_EPB104_U6_colony   | PCR primer to amplify and linearize flanking sequences of EPB104 plasmid and arRNA | GAGCGAGGAAGCGGAGAGC          |
| FW_EPB104_U6_Colony   | PCR primer to amplify and linearize flanking sequences of EPB104 plasmid and arRNA | CGTGTCTTGTCCAGAGCTCGATATC    |
| SMAD4_ORF_F           | PCR primer to amplify SMAD4 targeted mRNA                                          | GTGTTGATGACCTTCGTCGCTTATG    |
| SMAD4_ORF_R           | PCR primer to amplify SMAD4 targeted mRNA                                          | CAGGATTGTATTTTGTAGTCCACCATCC |
| FW_STAT1_gRNA_MZ      | PCR primer to amplify STAT1 targeted mRNA                                          | cgaacctgacttccatgcgg         |
| RW_STAT1.1_gRNA_MZ    | PCR primer to amplify STAT1 targeted mRNA                                          | GAGAAGGAAAACCTGTCGCCAGAG     |
| FW_SMAD4_UTR_gRNA_MZ2 | PCR primer to amplify SMAD4 UTR targeted mRNA                                      | TTCCTCTTCAGAACTTGTGTCAGGCA   |

|                       |                                                        |                                                      |
|-----------------------|--------------------------------------------------------|------------------------------------------------------|
| RW_SMAD4_UTR_gRNA_MZ2 | PCR primer to amplify SMAD4 UTR targeted mRNA          | CTCACCCACATGGCACATTATTTTTG                           |
| FW_amp_GAPDH_MZ       | PCR primer to amplify GAPDH targeted mRNA              | TCTTTCCCTACACGACGCTCTTCCGATCTCCCAGCAAGAGCACAAGAGGAAG |
| RW_amp_GAPDH_MZ       | PCR primer to amplify GAPDH targeted mRNA              | TGGAGTTCAGACGTGTGCTCTTCCGATCTGTACATGACAAGGTGCGGCTC   |
| FW_gRNA_PPIB_MZ       | targeted mRNA                                          | GATGGCACAGGAGGAAAGAGCATC                             |
| RW_gRNA_PPIB_MZ       | targeted mRNA                                          | GTTACAAAAGTGAGTCCATGGGCC                             |
| SMAD4_R_GA_context    | PCR primer to amplify SMAD4 targeted mRNA (GA context) | CAGGATTGTATTTTGTAGTCCACCATCC                         |
| SMAD4_F_GA_context    | PCR primer to amplify SMAD4 targeted mRNA (GA context) | CTGTCAGCTGCTGCTGGAATTG                               |
| RW_HindIII_ADAR1      | sequences include restriction sites for cloning hADAR1 | ACCTAATTATAACGTTCTAATGGTGATGGTGATGGTGTACTGG          |
| FW_XBAI_ADAR1_Flag    | sequences include restriction sites for cloning hADAR1 | GAATCGAATGTCTAGAATGGACTACAAGGACGACGATGAC             |
| MZpcDNA31_ECORI_RW    | sequences include restriction sites for cloning hADAR2 | GATGATCTGTGAATTCTCAGACTAGGGGCGTGAGTGAGAAC            |

|                                   |                                                              |                                               |
|-----------------------------------|--------------------------------------------------------------|-----------------------------------------------|
| MZ_pcDNA31_Xbai_FW                | sequences include restriction sites for cloning hADAR2       | CAGCATACGATCTAGAATGGACTACAAGGACGACGATGAC      |
| MZ_pcDNA3.1_mutant_hADAR2_xbaI_FW | sequences include restriction sites for cloning mutant ADAR2 | GATGATCTGTGAATTCTCAATGGTGATGGTGATGGTGACTAGG   |
| MZ_pcDNA3.1_mutant_hADAR2_xbaI_RW | sequences include restriction sites for cloning mutant ADAR2 | GCAGCATCGATCTAGAATGGACTACAAGGACGACGATGACAAAC  |
| H3_INS_FW                         | sequences for ADAR1-ADAR2 hybrids for Gibson Assembly        | GTCATGGCTTGCCACGGTGTCTCCCCAAGAACGCCCTG        |
| H3_BB_RW                          | sequences for ADAR1-ADAR2 hybrids for Gibson Assembly        | ATCAGGGCGTTCTTGGGGAGACACCGTGGCAAGCCATG        |
| H3_BB_FW                          | sequences for ADAR1-ADAR2 hybrids for Gibson Assembly        | CCGCCATTTTTAACTTGCACTTGGATACAGAGGTAACCCCAGTG  |
| H3_INS_RW                         | sequences for ADAR1-ADAR2 hybrids for Gibson Assembly        | CCTGTCACTGGGGTTACCTCTGTATCCAAGTGCAAGTTAAAAATG |
| H4_INS_FW                         | sequences for ADAR1-ADAR2 hybrids for Gibson Assembly        | GGAAAACACCAGGGCCCGTCCGGTGTTACCCTACAAG         |
| H4_BB_RW                          | sequences for ADAR1-ADAR2 hybrids for Gibson Assembly        | CAGTTTCTTGTAGGGTGAACACCGGACGGGCCCTGGTGTTTTC   |

|                  |                                                                              |                                                                                         |
|------------------|------------------------------------------------------------------------------|-----------------------------------------------------------------------------------------|
| H4_BB_FW         | sequences for ADAR1-ADAR2 hybrids for Gibson Assembly                        | GAAGGCAGAACGCATGGGTTTCTTGCACTTGGATCAGAC                                                 |
| H4_INS_RW        | sequences for ADAR1-ADAR2 hybrids for Gibson Assembly                        | GGCGTCTGATCCAAGTGCAAGAAACCCATGCGTTCTG                                                   |
| B2 PCR F         | PCR primer for targeted amplification and NGS of B2 oligo pool               | AATGATACGGCGACCACCGAGATCTACACTCTTTCC<br>CTACACGACGCTCTTCCGATCT GGACGAGCTGTACAAGTAACTAGT |
| mNG PCR F        | PCR primer for targeted amplification and NGS of mNG oligo pool              | AATGATACGGCGACCACCGAGATCTACACTCTTTCC<br>CTACACGACGCTCTTCCGATCT ACCACCTACACCTTTGCCA      |
| RT               | RT primer for targeted amplification and NGS of B2 and mNG oligo pools       | AGACGTGTGCTCTTCCGATCT TGGGTTGAGGGTAGTGAG                                                |
| RT_variable_half | RT primer for targeted amplification and NGS of B2 second (variable) strand  | AGACGTGTGCTCTTCCGATCT gatatcgaatGGCGCGCC                                                |
| B2_F_variable    | PCR primer for targeted amplification and NGS of B2 second (variable) strand | AATGATACGGCGACCACCGAGATCTACACTCTTTCCCTACACGACGCTCTTCCGATCT<br>CAAAACCCCTAAAACCTTCGAA    |
