# Supplementary material for: Dissecting the basis for differential substrate specificity of ADAR1 and ADAR2
Source: PubMed Central journal article supplement (PMC10713624; doi:10.1038/s41467-023-43633-0), 2023-12-11
Supplement: 41467_2023_43633_MOESM5_ESM.pdf [file 41467_2023_43633_MOESM5_ESM.pdf]

## **Description of Additional Supplementary Files**

File Name: Supplementary Data 1

Description: Primers and Oligos. This supplementary data file includes a comprehensive list of primers and oligonucleotides described in the experimental methods. It provides detailed information on the sequences, and specific applications of each primer or oligo.

File Name: Supplementary Data 2

Description: The R script for analyzing NGS sequencing data from the B2 and mNG oligo libraries transfected along with ADAR-specific plasmid in ADAR1 KO-HEK293T cell lines
